# Supplementary material for: Numerical Approach for the Assessment of Micro-Textured Walls Effects on Rubber Injection Moulding
Source: MDPI journal article supplement (doi:10.3390/polym13111739), 2021-05-26

## FKM80 – MOVING DIE RHEOMETER DATA

| Temperature |          |            |          |            |          |            |          |
|-------------|----------|------------|----------|------------|----------|------------|----------|
| 160°C       |          | 170°C      |          | 180°C      |          | 190°C      |          |
| Time [min]  | S' [dNm] | Time [min] | S' [dNm] | Time [min] | S' [dNm] | Time [min] | S' [dNm] |
| 0.030       | 3.370    | 0.035      | 4.874    | 0.032      | 3.740    | 0.045      | 3.701    |
| 0.060       | 4.637    | 0.065      | 4.601    | 0.062      | 4.070    | 0.075      | 3.796    |
| 0.090       | 4.589    | 0.095      | 3.783    | 0.092      | 3.255    | 0.105      | 2.785    |
| 0.120       | 3.761    | 0.125      | 3.023    | 0.122      | 2.570    | 0.135      | 2.166    |
| 0.150       | 3.153    | 0.155      | 2.527    | 0.152      | 2.141    | 0.165      | 1.804    |
| 0.180       | 2.745    | 0.185      | 2.204    | 0.182      | 1.868    | 0.195      | 1.587    |
| 0.210       | 2.474    | 0.215      | 1.985    | 0.212      | 1.682    | 0.225      | 1.457    |
| 0.240       | 2.293    | 0.245      | 1.840    | 0.242      | 1.555    | 0.255      | 1.374    |
| 0.270       | 2.166    | 0.275      | 1.746    | 0.272      | 1.476    | 0.345      | 1.309    |
| 0.300       | 2.081    | 0.365      | 1.635    | 0.362      | 1.391    | 0.355      | 1.310    |
| 0.390       | 1.970    | 0.432      | 1.623    | 0.392      | 1.392    | 0.442      | 1.420    |
| 0.427       | 1.954    | 0.445      | 1.622    | 0.429      | 1.405    | 0.525      | 1.641    |
| 0.510       | 1.938    | 0.575      | 1.658    | 0.512      | 1.462    | 0.615      | 2.034    |
| 0.530       | 1.941    | 0.829      | 1.819    | 0.692      | 1.723    | 0.663      | 2.309    |
| 0.570       | 1.948    | 0.935      | 1.913    | 0.826      | 2.040    | 0.675      | 2.389    |
| 0.824       | 2.024    | 1.226      | 2.241    | 0.842      | 2.083    | 0.705      | 2.602    |
| 1.221       | 2.181    | 1.295      | 2.331    | 0.937      | 2.391    | 0.787      | 3.309    |
| 1.470       | 2.278    | 1.479      | 2.622    | 0.962      | 2.485    | 0.821      | 3.654    |
| 1.618       | 2.348    | 1.623      | 2.887    | 1.082      | 2.999    | 0.839      | 3.856    |
| 2.015       | 2.544    | 1.625      | 2.891    | 1.157      | 3.391    | 0.855      | 4.045    |
| 2.160       | 2.637    | 1.895      | 3.518    | 1.219      | 3.745    | 0.885      | 4.422    |
| 2.412       | 2.810    | 1.933      | 3.622    | 1.222      | 3.764    | 0.915      | 4.827    |
| 2.582       | 2.938    | 2.020      | 3.874    | 1.232      | 3.818    | 0.945      | 5.266    |
| 2.730       | 3.060    | 2.059      | 3.991    | 1.352      | 4.640    | 0.975      | 5.737    |
| 2.809       | 3.128    | 2.135      | 4.238    | 1.472      | 5.614    | 1.005      | 6.240    |
| 3.205       | 3.530    | 2.375      | 5.139    | 1.592      | 6.763    | 1.035      | 6.771    |
| 3.270       | 3.600    | 2.417      | 5.311    | 1.619      | 7.053    | 1.065      | 7.332    |
| 3.533       | 3.934    | 2.585      | 6.088    | 1.712      | 8.081    | 1.095      | 7.915    |
| 3.536       | 3.938    | 2.795      | 7.210    | 1.832      | 9.564    | 1.125      | 8.525    |
| 3.602       | 4.027    | 2.814      | 7.318    | 2.016      | 12.065   | 1.215      | 10.491   |
| 3.750       | 4.237    | 3.005      | 8.505    | 2.094      | 13.162   | 1.236      | 10.968   |
| 3.999       | 4.623    | 3.185      | 9.744    | 2.192      | 14.486   | 1.325      | 13.032   |
| 4.142       | 4.872    | 3.210      | 9.932    | 2.282      | 15.645   | 1.395      | 14.641   |
| 4.396       | 5.352    | 3.425      | 11.557   | 2.372      | 16.682   | 1.425      | 15.294   |
| 4.502       | 5.574    | 3.607      | 13.005   | 2.413      | 17.117   | 1.455      | 15.921   |
| 4.793       | 6.231    | 3.665      | 13.463   | 2.462      | 17.598   | 1.485      | 16.517   |
| 4.862       | 6.401    | 3.875      | 15.113   | 2.552      | 18.380   | 1.515      | 17.081   |
| 5.190       | 7.275    | 4.004      | 16.056   | 2.672      | 19.237   | 1.545      | 17.602   |
| 5.192       | 7.279    | 4.087      | 16.621   | 2.792      | 19.935   | 1.575      | 18.083   |
| 5.582       | 8.470    | 4.267      | 17.743   | 2.810      | 20.027   | 1.633      | 18.903   |
| 5.587       | 8.488    | 4.401      | 18.474   | 2.942      | 20.629   | 1.635      | 18.933   |

|       |        |       |        |       |        |       |        |
|-------|--------|-------|--------|-------|--------|-------|--------|
| 5.912 | 9.615  | 4.417 | 18.554 | 3.122 | 21.279 | 1.665 | 19.302 |
| 5.984 | 9.885  | 4.567 | 19.248 | 3.207 | 21.534 | 1.695 | 19.636 |
| 6.182 | 10.641 | 4.798 | 20.134 | 3.302 | 21.794 | 1.785 | 20.471 |
| 6.381 | 11.445 | 5.047 | 20.898 | 3.542 | 22.346 | 1.875 | 21.100 |
| 6.497 | 11.919 | 5.195 | 21.286 | 3.604 | 22.460 | 1.965 | 21.604 |
| 6.692 | 12.738 | 5.347 | 21.645 | 3.665 | 22.576 | 2.030 | 21.899 |
| 6.778 | 13.108 | 5.592 | 22.138 | 3.872 | 22.901 | 2.085 | 22.112 |
| 7.175 | 14.817 | 5.647 | 22.236 | 4.001 | 23.068 | 2.171 | 22.408 |
| 7.322 | 15.428 | 5.989 | 22.779 | 4.323 | 23.429 | 2.235 | 22.593 |
| 7.572 | 16.432 | 6.093 | 22.935 | 4.398 | 23.498 | 2.427 | 23.035 |
| 7.622 | 16.616 | 6.097 | 22.940 | 4.795 | 23.803 | 2.445 | 23.072 |
| 7.892 | 17.570 | 6.386 | 23.294 | 4.893 | 23.869 | 2.715 | 23.484 |
| 7.969 | 17.814 | 6.637 | 23.563 | 5.192 | 24.036 | 2.824 | 23.611 |
| 8.193 | 18.500 | 6.783 | 23.714 | 5.589 | 24.220 | 3.105 | 23.873 |
| 8.366 | 18.970 | 7.117 | 23.987 | 5.673 | 24.258 | 3.220 | 23.953 |
| 8.523 | 19.369 | 7.180 | 24.036 | 5.986 | 24.365 | 3.585 | 24.167 |
| 8.760 | 19.903 | 7.577 | 24.310 | 6.383 | 24.479 | 3.617 | 24.176 |
| 8.763 | 19.908 | 7.597 | 24.315 | 6.780 | 24.576 | 4.014 | 24.323 |
| 8.793 | 19.973 | 7.974 | 24.540 | 6.813 | 24.584 | 4.411 | 24.434 |
| 9.159 | 20.681 | 8.371 | 24.746 | 7.176 | 24.648 | 4.487 | 24.454 |
| 9.556 | 21.329 | 8.408 | 24.764 | 7.573 | 24.711 | 4.808 | 24.515 |
| 9.933 | 21.861 | 8.768 | 24.915 | 7.970 | 24.768 | 5.205 | 24.577 |
|       |        | 9.164 | 25.059 | 8.315 | 24.803 | 5.602 | 24.618 |
|       |        | 9.488 | 25.167 | 8.367 | 24.805 | 5.687 | 24.630 |
|       |        | 9.561 | 25.195 | 8.764 | 24.843 | 5.999 | 24.658 |
|       |        | 9.938 | 25.298 | 9.161 | 24.869 | 6.396 | 24.683 |
|       |        |       |        | 9.558 | 24.902 | 6.793 | 24.699 |
|       |        |       |        | 9.855 | 24.916 | 7.190 | 24.713 |
|       |        |       |        | 9.935 | 24.925 | 7.587 | 24.724 |
|       |        |       |        |       |        | 7.984 | 24.733 |
|       |        |       |        |       |        | 8.148 | 24.739 |
|       |        |       |        |       |        | 8.381 | 24.740 |
|       |        |       |        |       |        | 8.778 | 24.741 |
|       |        |       |        |       |        | 9.174 | 24.740 |
|       |        |       |        |       |        | 9.571 | 24.736 |
|       |        |       |        |       |        | 9.618 | 24.742 |
|       |        |       |        |       |        | 9.778 | 24.752 |
|       |        |       |        |       |        | 9.948 | 24.738 |

| Temperature:          | 160°C |     | 170°C |     | 180°C |     | 190°C |     |
|-----------------------|-------|-----|-------|-----|-------|-----|-------|-----|
| <b>S'@Max S' (MH)</b> | 21.9  | dNm | 25.3  | dNm | 24.93 | dNm | 24.75 | dNm |
| <b>S'@Min S' (ML)</b> | 1.94  | dNm | 1.62  | dNm | 1.39  | dNm | 1.31  | dNm |
| <b>Time@1 dNm</b>     | 2.58  | min | 1.48  | min | 0.94  | min | 0.66  | min |
| <b>Time@2 dNm</b>     | 3.54  | min | 1.93  | min | 1.16  | min | 0.79  | min |
| <b>Time@10% cure</b>  | 3.53  | min | 2.06  | min | 1.22  | min | 0.82  | min |
| <b>Time@50% cure</b>  | 6.5   | min | 3.66  | min | 2.09  | min | 1.32  | min |
| <b>Time@90% cure</b>  | 8.76  | min | 6.09  | min | 3.66  | min | 2.17  | min |
| <b>S''@Max S''</b>    | 2.77  | dNm | 3.05  | dNm | 2.98  | dNm | 3.2   | dNm |
| <b>S''@Min S''</b>    | 2.13  | dNm | 1.88  | dNm | 1.65  | dNm | 1.59  | dNm |

## MOVING DIE RHEOMETER CURVES

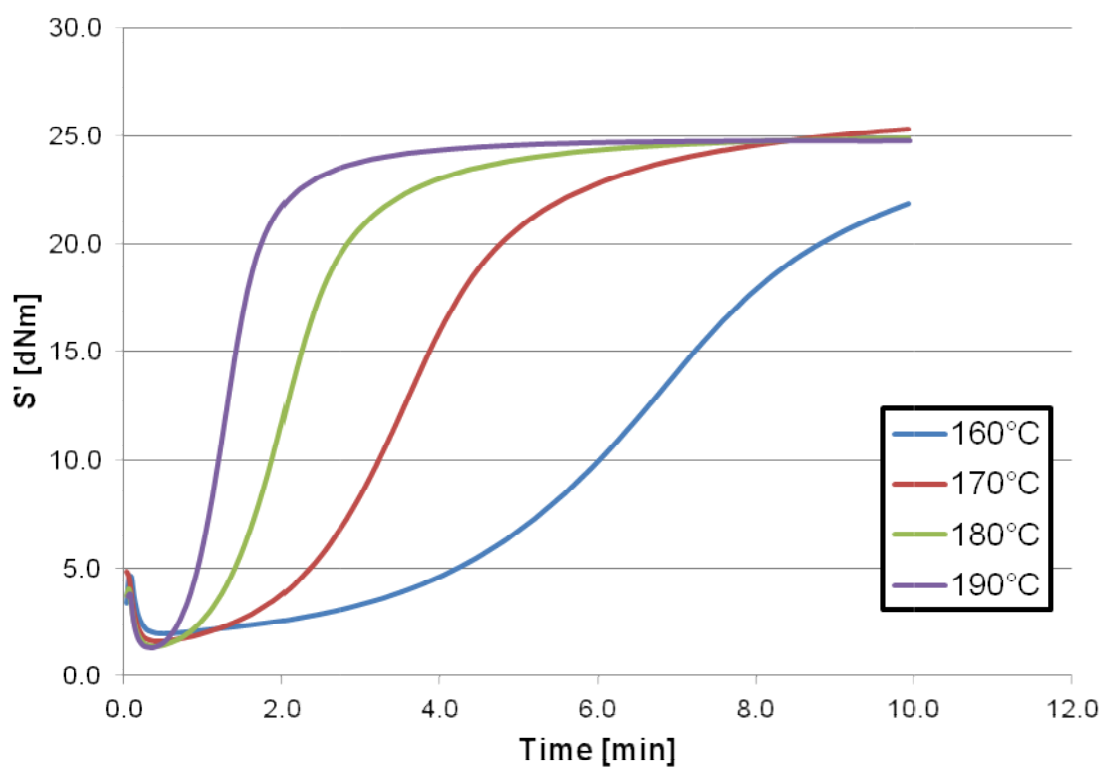

## FKM80 – RUBBER CAPILLAR RHEOMETER DATA

| Temperature     | 80°C             | 100°C    | 120°C    |
|-----------------|------------------|----------|----------|
| Shear Rate[1/s] | Viscosity [Pa s] |          |          |
| 10              | 9981.782         | 4597.109 | 2521.016 |
| 25              | 6610.328         | 2852.797 | 1656.715 |
| 50              | 3695.164         | 2114.117 | 1499.172 |
| 100             | 2440.609         | 1482.797 | 1187.402 |
| 250             | 1783.09          | 949.168  | 704.883  |
| 500             | 1098.978         | 838.75   | 514.672  |
| 750             | 874.326          | 633.041  | 437.307  |

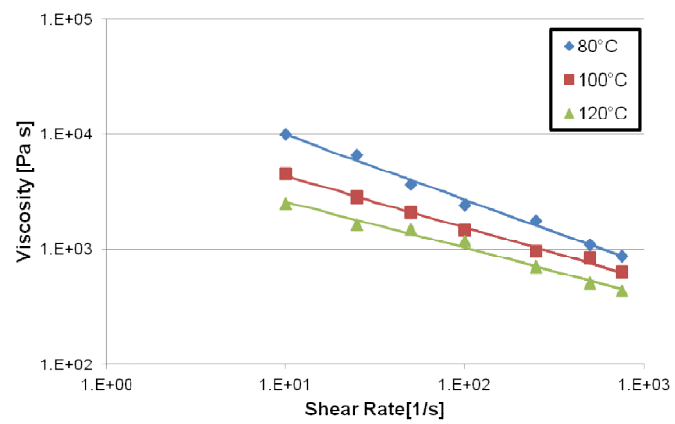

Supplement: s1 [file s1]
